# Supplementary material for: Effect of arginine : lysine ratio in free amino acid and protein form onl-NAME induced hypertension in hypercholesterolemic Wistar rats
Source: Royal Society of Chemistry journal article supplement (doi:10.1039/c6ra13632j), 2016-01-01
Supplement: c6ra13632j1.pdf [file c6ra13632j1.pdf]

### Supplementary data

**Table no. S1.** Proximate composition of moringa protein isolate (MPI).

| Proximate composition | (g/100g)   |
|-----------------------|------------|
| Moisture              | 4.0        |
| Ash                   | 1.3        |
| Protein               | 85.0       |
| Lipid                 | 0.6        |
| Carbohydrate          | 9.2        |
| <b>Total</b>          | <b>100</b> |

**Table no. S2.** Aminoacid data of moringa protein hydrolysates after 5h of hydrolysis.

| Aminoacid       | Trypsin      | Pepsin      | Pancreatin  | Alcalase    | Ficin       | MPH ex-<br>vivo |
|-----------------|--------------|-------------|-------------|-------------|-------------|-----------------|
| Asp             | 7.41         | 4.03        | 7.82        | 7.75        | 6.06        | 4.84            |
| Glu             | 20.38        | 22.17       | 19.82       | 20.31       | 23.86       | 22.0            |
| Ser             | 3.9          | 2.89        | 3.23        | 3.35        | 3.31        | 2.78            |
| Gly             | 6.64         | 10.72       | 8.99        | 6.82        | 8.34        | 7.55            |
| His             | 4.0          | 4.91        | 4.15        | 4.25        | 3.57        | 3.54            |
| <b>Arg</b>      | <b>8.54</b>  | <b>4.89</b> | <b>8.25</b> | <b>8.54</b> | <b>7.91</b> | <b>8.34</b>     |
| Thr             | 3.9          | 2.85        | 3.53        | 3.73        | 3.49        | 3.4             |
| Ala             | 4.65         | 5.02        | 4.71        | 5.0         | 4.63        | 4.55            |
| Pro             | 5.06         | 6.29        | 5.08        | 5.4         | 5.45        | 6.26            |
| Tyr             | 2.83         | 1.9         | 2.78        | 2.46        | 2.29        | 1.96            |
| Val             | 6.94         | 8.69        | 7.13        | 7.24        | 6.77        | 8.8             |
| Met             | 3.88         | 2.99        | 3.46        | 3.78        | 3.68        | 2.66            |
| Cys             | 0.522        | 0.33        | 0.22        | 0.38        | 0.26        | 0.41            |
| Ile             | 4.24         | 4.63        | 3.97        | 3.96        | 3.84        | 4.04            |
| Leu             | 6.93         | 7.19        | 6.96        | 7.27        | 7.2         | 7.67            |
| Phe             | 6.43         | 8.4         | 6.63        | 6.63        | 6.5         | 8.83            |
| <b>Lys</b>      | <b>3.755</b> | <b>2.13</b> | <b>3.28</b> | <b>3.03</b> | <b>2.82</b> | <b>2.38</b>     |
| <b>Arg: Lys</b> | 2.27         | 2.30        | 2.52        | 2.82        | 2.80        | 3.50            |

**Table no. S3.** ACE inhibitory activity of moringa protein hydrolysates

| Samples     | IC <sub>50</sub> (mg/ml) |
|-------------|--------------------------|
| Trypsin     | 4.16 ± 0.2               |
| Pepsin      | 2.1 ± 0.1                |
| Pancreatin  | 4.74 ± 0.4               |
| Alcalase    | 5.35 ± 0.3               |
| Ficin       | 4.34 ± 0.3               |
| MPI         | 16.83 ± 1.5              |
| MPH ex-vivo | 1.98 ± 0.2               |

**Table no. S4.** Kidney damage markers like BUN, creatinine and albumin were analysed in plasmaparameters. Kidney tissue was analysed for protein carbonyl levels and Reactive oxygen species (ROS) in hypertensive rats indicates kidney damage. Values are expressed as mean ± standard deviation (p<0.05).

|                     | Samples                    | Control      | LN           | HCD          | LN FAA       | LN MPI       |
|---------------------|----------------------------|--------------|--------------|--------------|--------------|--------------|
| <b>Blood plasma</b> | Albumin(g/dL)              | 3.16 ± 0.2   | 2.93 ± 0.03  | 3.14 ± 0.2   | 3.45 ± 0.1   | 3.35 ± 0.2   |
|                     | Creatinine (m/dL)          | 0.88 ± 0.2   | 2.39 ± 0.2   | 0.95 ± 0.1   | 0.39 ± 0.1   | 0.35 ± 0.1   |
| <b>Kidney</b>       | BUN (mg/dL)                | 23.5 ± 4.4   | 177.2 ± 42   | 193.9 ± 41   | 292.4 ± 19   | 246.9 ± 24   |
|                     | Protein Carbonyl (nmol/mg) | 0.099 ± 0.02 | 0.179 ± 0.01 | 0.126 ± 0.01 | 0.162 ± 0.02 | 0.115 ± 0.02 |
|                     | ROS (nmol/mg/min)          | 131.2 ± 10   | 153.5 ± 3    | 148.0 ± 10   | 148.0 ± 9    | 146.7 ± 2    |
